# Supplementary material for: Systematic review: non-adherence and non-persistence in intravitreal treatment
Source: Springer Nature journal article supplement (doi:10.1007/s00417-020-04798-2), 2020-06-22
Supplement: MOESM1 [file 18107624]

# Systematic Review: non-adherence and non-persistence in intravitreal treatment

Graefe's Archive for Clinical and Experimental Ophthalmology

Christoph Ehlken, Focke Ziemssen, Nicole Eter, Ines Lanzl, Hakan Kaymak, Albrecht Lommatzsch and Alexander K. Schuster

## Corresponding author:

Dr. med. Christoph Ehlken, F.E.B.O.  
Klinik für Ophthalmologie des UKSH, Campus Kiel  
[christoph.ehlken@uksh.de](mailto:christoph.ehlken@uksh.de)

## **Suppl. 1:** Complete list of search keywords from EMBASE and Medline (via PubMed) literature research

((('wet macular degeneration'/exp OR 'age related macular degeneration'/exp OR diabet\* NEAR/3 macula\* OR ('dme':ti AND macula\*) OR (('retina\*' NEAR/5 'venous') AND (venous NEAR/5 'occlu\*')) OR 'retina\* vein\*' NEAR/5 'occlu\*' OR 'diabetic macular edema'/exp OR 'retina vein occlusion'/exp OR 'central retina vein occlusion'/exp OR 'branch retinal vein occlusion'/exp) OR (exudat\* OR wet OR neovascular\*) NEAR/4 'age-related macular degeneration' OR (exudat\* OR wet OR neovascular\*) NEAR/4 'age related macular degeneration' OR (exudat\* OR wet OR neovascular\*) NEAR/4 'agerelated macular degeneration') AND (('patient compliance'/exp OR 'treatment refusal'/exp OR 'medication compliance'/exp OR 'patient dropout'/exp OR (complan\* OR noncomplan\* OR adhere\* OR dropout\* OR termination OR persistence) OR (nonadheren\* OR nonpersistence OR 'healthcare constraint\*' OR 'patient s perspective\*' OR 'patients perspective\*' OR barriers) OR ('treatment satisfaction\*' OR discontinu\* OR 'disease perception\*' OR 'patient preference\*')) OR (('coping':ab,ti OR 'comorbidit\*':ab,ti OR 'pain':ab,ti) OR 'coping behavior'/exp OR 'comorbidity'/exp OR 'pain'/exp)) AND (((('aflibercept\*':ti OR 'vegf trap\*':ti OR 'eylea':ti OR 'eylear':ti OR 'eyleatm':ti OR 'ranibizumab\*':ti OR 'lucentis\*':ti OR ('bevacizumab':ti OR 'avastin':ti OR 'avastine':ti OR 'avastinr':ti OR 'avastintm':ti) OR ('dexametason\*':ti OR 'dexamthason\*':ti OR 'ozurdex\*':ti OR 'triamcinolon\*':ti OR 'fluocinolone\*':ti) OR 'pegaptanib\*':ti OR 'aflibercept'/exp/mj OR 'bevacizumab'/exp/mj OR 'pegaptanib'/exp/mj OR 'ranibizumab'/exp/mj OR 'dexamethasone'/exp/mj OR 'triamcinolone'/exp/mj OR 'triamcinolone acetone'/exp/mj OR 'triamcinolone acetate'/exp/mj OR 'triamcinolone diacetate'/exp/mj OR 'triamcinolone hexacetone'/exp/mj OR 'dexamethasone acetate'/exp/mj OR 'dexamethasone cipeclate'/exp/mj OR 'dexamethasone isonicotinate'/exp/mj OR 'fluocinolone'/exp/mj OR 'fluocinolone acetone'/exp/mj) OR ('anti vegf' OR antivegf) OR 'vegf':ti OR 'intravitreal\*':ti OR 'intravitreal drug administration'/exp/mj) OR ('vascular endothelial growth factor\*':ab,ti OR 'dexamethason\*':ti))) NOT (((('wet macular degeneration'/exp OR 'age related macular degeneration'/exp OR diabet\* NEAR/3 macula\* OR ('dme':ti AND macula\*) OR (('retina\*' NEAR/5 'venous') AND (venous NEAR/5 'occlu\*')) OR 'retina\* vein\*' NEAR/5 'occlu\*' OR 'diabetic macular edema'/exp OR 'retina vein occlusion'/exp OR 'central retina vein occlusion'/exp OR 'branch retinal vein occlusion'/exp) OR (exudat\* OR wet OR neovascular\*) NEAR/4 'age-related macular

degeneration' OR (exudat\* OR wet OR neovascular\*) NEAR/4 'age related macular degeneration'  
OR (exudat\* OR wet OR neovascular\*) NEAR/4 'agerelated macular degeneration') AND (('patient  
compliance'/exp OR 'treatment refusal'/exp OR 'medication compliance'/exp OR 'patient  
dropout'/exp OR (complian\* OR noncomplian\* OR adhere\* OR dropout\* OR termination OR  
persistence) OR (nonadheren\* OR nonpersistence OR 'healthcare constraint\*' OR 'patient s  
perspective\*' OR 'patients perspective\*' OR barriers) OR ('treatment satisfaction\*' OR discontinu\*  
OR 'disease perception\*' OR 'patient preference\*')) OR (('coping':ab,ti OR 'comorbidit\*':ab,ti OR  
'pain':ab,ti) OR 'coping behavior'/exp OR 'comorbidity'/exp OR 'pain'/exp)) AND (((('aflibercept\*':ti  
OR 'vegf trap\*':ti OR 'eylea':ti OR 'eylear':ti OR 'eyleatm':ti OR 'ranibizumab\*':ti OR 'lucentis\*':ti) OR  
( 'bevacizumab':ti OR 'avastin':ti OR 'avastine':ti OR 'avastinr':ti OR 'avastintm':ti) OR  
( 'dexametason\*':ti OR 'dexamthason\*':ti OR 'ozurdex\*':ti OR 'triamcinolon\*':ti OR 'fluocinolone\*':ti) OR  
'pegaptanib\*':ti OR 'aflibercept'/exp/mj OR 'bevacizumab'/exp/mj OR 'pegaptanib'/exp/mj OR  
'ranibizumab'/exp/mj OR 'dexamethasone'/exp/mj OR 'triamcinolone'/exp/mj OR 'triamcinolone  
acetoneide'/exp/mj OR 'triamcinolone acetate'/exp/mj OR 'triamcinolone diacetate'/exp/mj OR  
'triamcinolone hexacetoneide'/exp/mj OR 'dexamethasone acetate'/exp/mj OR 'dexamethasone  
cipecilate'/exp/mj OR 'dexamethasone isonicotinate'/exp/mj OR 'fluocinolone'/exp/mj OR  
'fluocinolone acetoneide'/exp/mj) OR ('anti vegf' OR antivegf) OR 'vegf':ti OR 'intravitreal\*':ti OR  
'intravitreal drug administration'/exp/mj) OR ('vascular endothelial growth factor\*':ab,ti OR  
'dexamethason\*':ti))) AND ('review'/it OR 'short survey'/it))
