# Supplementary material for: Systematic review: non-adherence and non-persistence in intravitreal treatment
Source: Springer Nature journal article supplement (doi:10.1007/s00417-020-04798-2), 2020-06-22
Supplement: MOESM2 [file 18107624]

# Systematic Review: non-adherence and non-persistence in intravitreal treatment

Graefe's Archive for Clinical and Experimental Ophthalmology

Christoph Ehlken, Focke Ziemssen, Nicole Eter, Ines Lanzl, Hakan Kaymak, Albrecht Lommatzsch and Alexander K. Schuster

## Corresponding author:

Dr. med. Christoph Ehlken, F.E.B.O.  
Klinik für Ophthalmologie des UKSH, Campus Kiel  
[christoph.ehlken@uksh.de](mailto:christoph.ehlken@uksh.de)

## **Suppl. 2:** Studies evaluating pain and its risk factors during or after IVT

| <b>First author</b> | <b>Study type</b>                       | <b>Data acquisition</b> | <b>Number of patients/eyes</b> | <b>Objective</b>                                                                     | <b>Results</b>                                                               |
|---------------------|-----------------------------------------|-------------------------|--------------------------------|--------------------------------------------------------------------------------------|------------------------------------------------------------------------------|
| <b>Alattas[59]</b>  | prospective, uncontrolled               | questionnaire           | 56                             | comparison of bimanual lid retraction versus metal speculum                          | bimanual lid retraction was associated with less discomfort                  |
| <b>Chua[60]</b>     | consecutive case series                 | questionnaire           | 100                            | comparison of expected discomfort (before IVT) versus actual discomfort              | actual discomfort was significantly less than expected discomfort            |
| <b>Cintra[61]</b>   | prospective, randomized                 | VAS                     | 60                             | comparison of different methods of anesthesia (topical, subconjunctival, peribulbar) | less pain with peribulbar anesthesia compared to topical and subconjunctival |
| <b>Cohen[62]</b>    | Prospective, single-blinded, randomized | interview               | 57                             | preference of anesthesia: subconjunctival versus topical                             | 88% preferred subconjunctival anesthesia over topical                        |
| <b>Gregori[48]</b>  | randomized                              | Interview, examination  | 50                             | discomfort and safety of subconjunctival versus topical lidocaine                    | both methods equally effective, less ocular irritation after topical         |

|                      |                                         |                     |             |                                                                                                                                      |                                                                                                                                                                    |
|----------------------|-----------------------------------------|---------------------|-------------|--------------------------------------------------------------------------------------------------------------------------------------|--------------------------------------------------------------------------------------------------------------------------------------------------------------------|
| <b>Gueler[63]</b>    | prospective, non-randomized             | VAS                 | 70          | pain experience during injection with 30-gauge versus 27-gauge needles                                                               | 30-gauge more tolerable than 27-gauge                                                                                                                              |
| <b>Kaderli[64]</b>   | prospective, randomized                 | interview           | 28          | comparison of different methods of anesthesia (topical, subconjunctival)                                                             | better pain control with subconjunctival, procedure itself more painful and hemorrhage                                                                             |
| <b>Karimi[46]</b>    | prospective, randomized                 | VAS                 | 1004        | correlation of injection site with pain                                                                                              | superotemporal most painful, superonasal least painful                                                                                                             |
| <b>Kozak[65]</b>     | crossover and consecutive groups        | VAS                 | 28          | comparison of different methods of anesthesia (topical, subconjunctival)                                                             | no difference in pain scores, more chemosis and hemorrhage with subconjunctival                                                                                    |
| <b>Lagstein[66]</b>  | prospective, randomized, double-blind   | rating scale        | 39          | comparison of pain under IVT with or without prior application of apraclonidine                                                      | prior application of topical apraclonidine significantly reduced pain                                                                                              |
| <b>Loureiro[47]</b>  | cross-sectional, randomized             | VAS                 | 54          | pain experience and intraocular during injection with 30-gauge versus 27-gauge needles                                               | comparable pain/discomfort, lower IOP spikes after 27-gauge injection                                                                                              |
| <b>Makri[67]</b>     | prospective, double-blinded, randomized | VAS, questionnaires | 52          | evaluation of analgesic effect of topical nepafenac                                                                                  | a single drop of topical nepafenac reduced pain at injection and up to 6 hours after                                                                               |
| <b>Massamba[68]</b>  | prospective interventional case series  | VAS                 | 112         | evaluation of risk factors for pain                                                                                                  | risk factors were: left eye, IVT location temporal superior quadrant. Not correlated: age, gender, number of injections, waiting time, history of cataract surgery |
| <b>Moisseiev[69]</b> | case series, matched control group      | VAS                 | 57          | comparison of pain after Ozurdex versus bevacizumab                                                                                  | comparable discomfort for Ozurdex and bevaicumab injections                                                                                                        |
| <b>Rahimy[70]</b>    | prospective, randomized, crossover      | questionnaire, VAS  | 36 patients | comparison of bimanual lid retraction versus metal speculum                                                                          | patients favored bimanual retraction over speculum                                                                                                                 |
| <b>Rifkin[71]</b>    | prospective, randomized                 | VAS                 | 60          | comparison of different methods of anesthesia (tetracaine, proparacaine, TetraVisc)                                                  | pain is generally mild, no differences between topical medication                                                                                                  |
| <b>Sanabria[72]</b>  | prospective, randomized, double-masked  | VAS                 | 156         | comparison of different pre- and post-IVT regimes (tetracaine+naphazoline versus lidocaine; tobramycin versus tobramycin+diclofenac) | effects of different regimes comparable                                                                                                                            |
| <b>Shiroma[73]</b>   | prospective, randomized                 | VAS                 | 260         | comparison of five different concentrations of lidocaine gel                                                                         | lidocaine drops effective and safe at concentrations from 2 to 12%                                                                                                 |

|                      |                                         |               |     |                                                                                                          |                                                                                                                                 |
|----------------------|-----------------------------------------|---------------|-----|----------------------------------------------------------------------------------------------------------|---------------------------------------------------------------------------------------------------------------------------------|
| <b>Tailor[74]</b>    | prospective, interventional case series | questionnaire | 42  | evaluation of distress during the different steps of the injection process                               | injection itself with highest percentage of distress; application and removal of drape and lid speculum caused >50% of distress |
| <b>Ulrich[75]</b>    | prospective, double-masked, randomized  | scale 0-3     | 120 | evaluation of discomfort with and without application of a single drop of nepafenac before IVT           | statistically less pain 6 hours after IVT with nepafenac, no statistically significant differences at 1 and 24 hours            |
| <b>Van Asten[76]</b> | randomized, crossover                   | VAS           | 36  | comparison of pain after use of 30-G and 33-G needles                                                    | pain comparable with both sizes, but potentially less scleral damage after 33-G needle (less reflux)                            |
| <b>Yau[77]</b>       | prospective, randomized, double-blinded | VAS           | 93  | comparison of 0.5% tetracaine hydrochloride with or without 4% lidocaine pledget versus 4% cocaine drops | no statistically significant differences                                                                                        |

VAS: visual analog scale
